# Supplementary material for: Global Drug-Resistance Patterns and the Management of Latent Tuberculosis Infection in Immigrants to the United States
Source: Atypon-hosted journal article supplement (doi:10.1056/nejmsa021099), 2002-12-05
Supplement: 1850sa.pdf [file 1850sa.pdf]

# Supplementary Appendix

This appendix has been provided by the authors to give readers additional information about their work.

Supplement to: Khan K, Muennig P, Behta M, Zivin JG. Global Drug-Resistance Patterns and the Management of Latent Tuberculosis Infection in Immigrants to the United States. *N Engl J Med* 2002;347:1850-9.

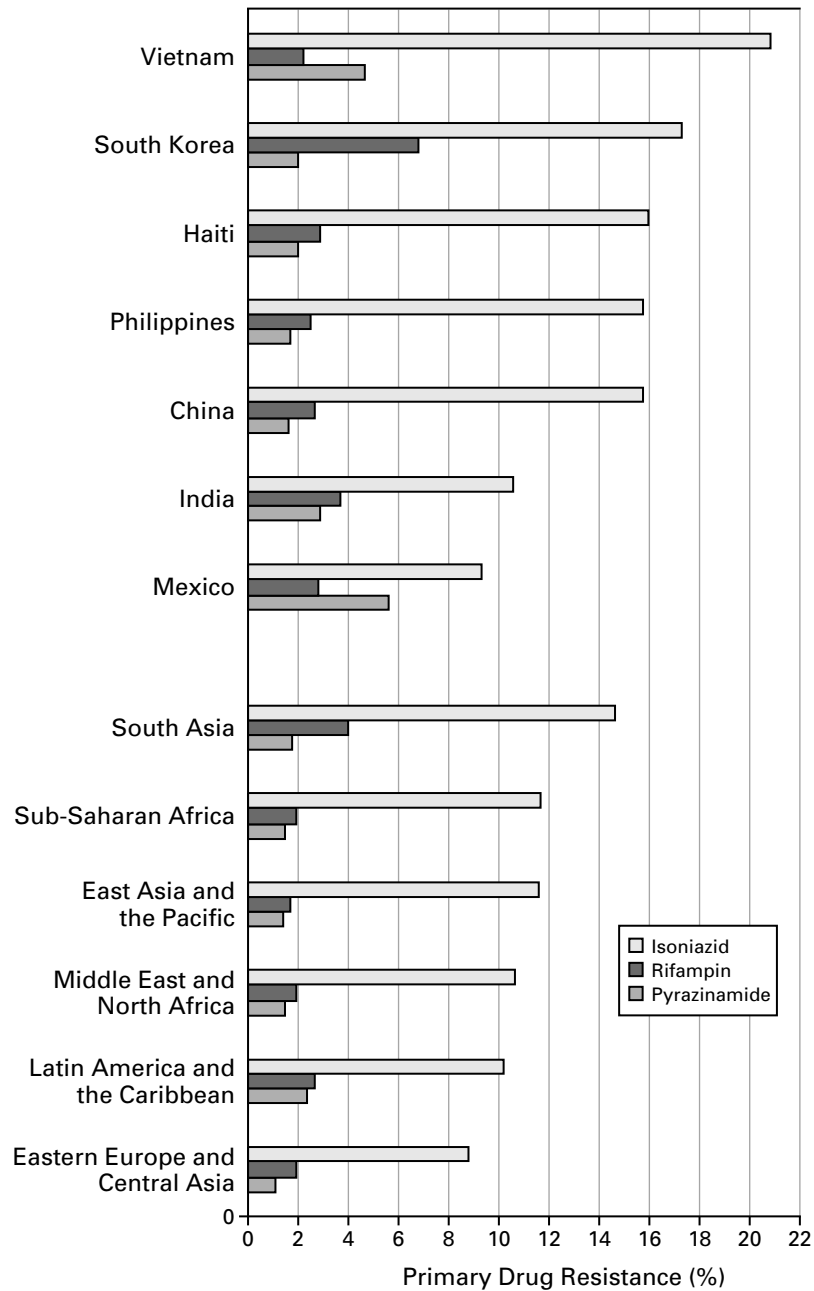

**Supplementary Appendix 1.** Primary Drug-Resistance Profiles According to the Geographic Region of Origin. India is excluded from South Asia; Vietnam, South Korea, the Philippines, and China are excluded from East Asia and the Pacific; and Haiti and Mexico are excluded from Latin America and the Caribbean. Data are from the Centers for Disease Control and Prevention.

**SUPPLEMENTARY APPENDIX 2. PROJECTED ANNUAL NUMBER OF SEVERE CASES  
OF DRUG-INDUCED HEPATITIS.\***

| COUNTRY OR GEOGRAPHIC REGION<br>OF ORIGIN | AVERAGE NO. OF<br>ADULT IMMIGRANTS<br>TO THE UNITED<br>STATES | PROJECTED NO.<br>OF IMMIGRANTS<br>WITH LATENT<br>INFECTION† | PROJECTED<br>NO. OF CASES<br>ATTRIBUTABLE<br>TO ISONIAZID‡ | PROJECTED<br>NO. OF CASES<br>ATTRIBUTABLE TO<br>RIFAMPIN PLUS<br>PYRAZINAMIDE‡ |
|-------------------------------------------|---------------------------------------------------------------|-------------------------------------------------------------|------------------------------------------------------------|--------------------------------------------------------------------------------|
| China                                     | 32,974                                                        | 13,862                                                      | 1                                                          | 3                                                                              |
| Philippines                               | 43,191                                                        | 22,386                                                      | 2                                                          | 5                                                                              |
| Vietnam                                   | 36,829                                                        | 18,105                                                      | 2                                                          | 5                                                                              |
| South Korea                               | 15,240                                                        | 6,543                                                       | 1                                                          | 3                                                                              |
| Mexico                                    | 227,267                                                       | 55,090                                                      | 5                                                          | 14                                                                             |
| Haiti                                     | 14,216                                                        | 8,254                                                       | 1                                                          | 3                                                                              |
| India                                     | 29,765                                                        | 14,632                                                      | 1                                                          | 3                                                                              |
| East Asia and the Pacific§                | 31,895                                                        | 16,247                                                      | 1                                                          | 3                                                                              |
| South Asia¶                               | 16,962                                                        | 7,886                                                       | 1                                                          | 3                                                                              |
| Eastern Europe and Central Asia           | 68,286                                                        | 16,553                                                      | 1                                                          | 3                                                                              |
| Middle East and North Africa              | 34,079                                                        | 10,081                                                      | 1                                                          | 3                                                                              |
| Sub-Saharan Africa                        | 23,674                                                        | 9,742                                                       | 1                                                          | 3                                                                              |
| Latin America and the Caribbean           | 125,606                                                       | 41,626                                                      | 4                                                          | 11                                                                             |
| Total                                     | 669,984                                                       | 241,005                                                     | 22                                                         | 62                                                                             |

\*Severe cases are defined as those resulting in hospitalization.

†Cases with true positive and false positive tuberculin skin-test results are included.

‡The figures are rounded to the nearest whole number.

§China, the Philippines, South Korea, and Vietnam are excluded.

¶India is excluded.

||Mexico and Haiti are excluded.

---

---

**SUPPLEMENTARY APPENDIX 3. SUPPLEMENTARY REFERENCES.**

---

- | REFERENCE<br>IN TEXT | SUPPLEMENTARY REFERENCES                                                                                                                                                                                                                                                                                                                                                                                                                                                                                                                                                                                                                                                                                                                                                                                                                                |
|----------------------|---------------------------------------------------------------------------------------------------------------------------------------------------------------------------------------------------------------------------------------------------------------------------------------------------------------------------------------------------------------------------------------------------------------------------------------------------------------------------------------------------------------------------------------------------------------------------------------------------------------------------------------------------------------------------------------------------------------------------------------------------------------------------------------------------------------------------------------------------------|
| 1                    | Smith R, Coast J. Antimicrobial resistance: a global response. <i>Bull World Health Organ</i> 2002;80:126-33. Central Intelligence Agency. The global infectious disease threat and its implications for the United States. (Accessed November 8, 2002, at <a href="http://www.odci.gov/cia/publications/nie/report/nie99-17d.html">http://www.odci.gov/cia/publications/nie/report/nie99-17d.html</a> .)                                                                                                                                                                                                                                                                                                                                                                                                                                               |
| 2                    | Rose AM, Watson JM, Graham C, et al. Tuberculosis at the end of the 20th century in England and Wales: results of a national survey in 1998. <i>Thorax</i> 2001;56:173-9. [Erratum, <i>Thorax</i> 2001;56:504.]<br>Orr PH, Manfreda J, Hershfield ES. Tuberculosis surveillance in immigrants to Manitoba. <i>CMAJ</i> 1990;142:453-8.<br>Heath TC, Roberts C, Winks M, Capon AG. The epidemiology of tuberculosis in New South Wales 1975-1995: the effects of immigration in a low prevalence population. <i>Int J Tuberc Lung Dis</i> 1998;2:647-54.<br>MacIntyre CR, Dwyer B, Streeton JA. The epidemiology of tuberculosis in Victoria. <i>Med J Aust</i> 1993;159:672-7.<br>McKenna MT, McCray E, Onorato I. The epidemiology of tuberculosis among foreign-born persons in the United States, 1986 to 1993. <i>N Engl J Med</i> 1995;332:1071-6. |
| 5                    | Chin DP, DeRiemer K, Small PM, et al. Differences in contributing factors to tuberculosis incidence in U.S.-born and foreign-born persons. <i>Am J Respir Crit Care Med</i> 1998;158:1797-803.                                                                                                                                                                                                                                                                                                                                                                                                                                                                                                                                                                                                                                                          |
| 6                    | Recommendations for prevention and control of tuberculosis among foreign-born persons: report of the Working Group on Tuberculosis among Foreign-Born Persons. <i>MMWR Morb Mortal Wkly Rep</i> 1998;47(RR-16):1-29.                                                                                                                                                                                                                                                                                                                                                                                                                                                                                                                                                                                                                                    |
| 9                    | Anti-tuberculosis drug resistance in the world. Report no. 2. Prevalence and trends: the WHO/IUATLD global project on anti-tuberculosis drug resistance surveillance. Geneva: World Health Organization, 2000. (WHO/CDS/TB/2000.278.)<br>Anti-tuberculosis drug resistance in the world. The WHO/IUATLD global project on anti-tuberculosis drug resistance surveillance 1994-1997. Geneva: World Health Organization, 1997. (WHO/TB/97.229.)                                                                                                                                                                                                                                                                                                                                                                                                           |
| 11                   | Pablos-Méndez A, Raviglione MC, Laszlo A, et al. Global surveillance for antituberculosis-drug resistance, 1994-1997. <i>N Engl J Med</i> 1998;338:1641-9.                                                                                                                                                                                                                                                                                                                                                                                                                                                                                                                                                                                                                                                                                              |
| 11                   | Goldberg SV, Duchin JS, Shields T, Nolan CM. Four-month, four-drug preventive therapy for inactive pulmonary tuberculosis. <i>Am J Respir Crit Care Med</i> 1999;160:508-12.                                                                                                                                                                                                                                                                                                                                                                                                                                                                                                                                                                                                                                                                            |
| 31                   | Polesky A, Farber HW, Gottlieb DJ, et al. Rifampin preventive therapy for tuberculosis in Boston's homeless. <i>Am J Respir Crit Care Med</i> 1996;154:1473-7.<br>Villarino ME, Ridzon R, Weismuller PC, et al. Rifampin preventive therapy for tuberculosis infection: experience with 157 adolescents. <i>Am J Respir Crit Care Med</i> 1997;155:1735-8.                                                                                                                                                                                                                                                                                                                                                                                                                                                                                              |
| 36                   | Millard PS, Wilcosky TC, Reade-Christopher SJ, Weber DJ. Isoniazid-related fatal hepatitis. <i>West J Med</i> 1996;164:486-91.<br>Salpeter SR. Fatal isoniazid-induced hepatitis: its risk during chemoprophylaxis. <i>West J Med</i> 1993;159:560-4.                                                                                                                                                                                                                                                                                                                                                                                                                                                                                                                                                                                                   |
| 40                   | Immigration admitted by region and country of birth: fiscal years 1986-98. Washington, D.C.: Immigration and Naturalization Service, 2002. (Accessed November 8, 2002, at <a href="http://www.ins.gov/graphics/aboutins/statistics/Imm98Excel/Table_3.xls">http://www.ins.gov/graphics/aboutins/statistics/Imm98Excel/Table_3.xls</a> .)<br>Immigrants admitted by age and sex: fiscal years 1986-98. Washington, D.C.: Immigration and Naturalization Service, 2002. (Accessed November 8, 2002, at <a href="http://www.ins.gov/graphics/aboutins/statistics/Imm98Excel/Table_12.xls">http://www.ins.gov/graphics/aboutins/statistics/Imm98Excel/Table_12.xls</a> .)                                                                                                                                                                                   |
| 43                   | Anderson RN. A method for constructing complete annual U.S. life tables. <i>Vital and health statistics. Series 2. No. 129</i> . Hyattsville, Md.: National Center for Health Statistics, 1999. (DHHS publication no. (PHS) 2000-1329.)<br>Current population survey: annual demographic file, 1997. Washington, D.C.: Census Bureau, 1997 (software).                                                                                                                                                                                                                                                                                                                                                                                                                                                                                                  |
| 52                   | Bock NB, Rogers T, Tapia JR, Herron GD, DeVoe B, Geiter LJ. Acceptability of short-course rifampin and pyrazinamide treatment of latent tuberculosis infection among jail inmates. <i>Chest</i> 2001;119:833-7.<br>Burman WJ, Reves RR. Hepatotoxicity from rifampin plus pyrazinamide: lessons for policymakers and messages for care providers. <i>Am J Respir Crit Care Med</i> 2001;164:1112-3.                                                                                                                                                                                                                                                                                                                                                                                                                                                     |
| 53                   | Hwang SJ, Wu JC, Lee CN, et al. A prospective clinical study of isoniazid-rifampicin-pyrazinamide-induced liver injury in an area endemic for hepatitis B. <i>J Gastroenterol Hepatol</i> 1997;12:87-91.                                                                                                                                                                                                                                                                                                                                                                                                                                                                                                                                                                                                                                                |
-
